# Supplementary material for: Sclerotioloids A–C: Three New Alkaloids from the Marine-Derived Fungus Aspergillus sclerotiorum ST0501
Source: MDPI journal article supplement (doi:10.3390/md21040219), 2023-03-29
Supplement: s1 [file s1]

Sclerotiols A–C: Three New Alkaloids from the Marine-derived Fungus

*Aspergillus sclerotiorum* ST0501

## List of Supporting Information

- Figure S1.**  $^1\text{H}$  NMR spectrum of compound **1** in  $\text{DMSO-}d_6$  (400 MHz).
- Figure S2.**  $^{13}\text{C}$  NMR spectrum of compound **1** in  $\text{DMSO-}d_6$  (100 MHz).
- Figure S3.** Partial  $^{13}\text{C}$  NMR spectrum of compound **1** in  $\text{DMSO-}d_6$  (100 MHz).
- Figure S4.**  $^1\text{H-}^1\text{H}$  COSY spectrum of compound **1** in  $\text{DMSO-}d_6$ .
- Figure S5.** HSQC spectrum of compound **1** in  $\text{DMSO-}d_6$ .
- Figure S6.** HMBC spectrum of compound **1** in  $\text{DMSO-}d_6$ .
- Figure S7.** HRESIMS spectrum (positive ion mode) of compound **1**.
- Figure S8.**  $^1\text{H}$  NMR spectrum of compound **2** in  $\text{DMSO-}d_6$  (600 MHz).
- Figure S9.** Partial  $^1\text{H}$  NMR spectrum of compound **2** in  $\text{DMSO-}d_6$  (600 MHz).
- Figure S10.**  $^{13}\text{C}$  NMR spectrum of compound **2** in  $\text{DMSO-}d_6$  (150 MHz).
- Figure S11.** Partial  $^{13}\text{C}$  NMR spectrum of compound **2** in  $\text{DMSO-}d_6$  (150 MHz).
- Figure S12.**  $^1\text{H-}^1\text{H}$  COSY spectrum of compound **2** in  $\text{DMSO-}d_6$ .
- Figure S13.** HSQC spectrum of compound **2** in  $\text{DMSO-}d_6$ .
- Figure S14.** HMBC spectrum of compound **2** in  $\text{DMSO-}d_6$ .
- Figure S15.** HRESIMS spectrum (positive ion mode) of compound **2**.
- Figure S16.**  $^1\text{H}$  NMR spectrum of compound **3** in  $\text{DMSO-}d_6$  (500 MHz).
- Figure S17.**  $^{13}\text{C}$  NMR spectrum of compound **3** in  $\text{DMSO-}d_6$  (125 MHz).
- Figure S18.**  $^1\text{H-}^1\text{H}$  COSY spectrum of compound **3** in  $\text{DMSO-}d_6$ .
- Figure S19.** HSQC spectrum of compound **3** in  $\text{DMSO-}d_6$ .
- Figure S20.** HMBC spectrum of compound **3** in  $\text{DMSO-}d_6$ .
- Figure S21.** NOESY spectrum of compound **3** in  $\text{DMSO-}d_6$ .
- Figure S22.** HRESIMS spectrum (positive ion mode) of compound **3**.
- Table S1.** The activity results about antitumor of compound **3**.
- Table S2.** The activity results about anti-inflammatory of compounds **1–3**.

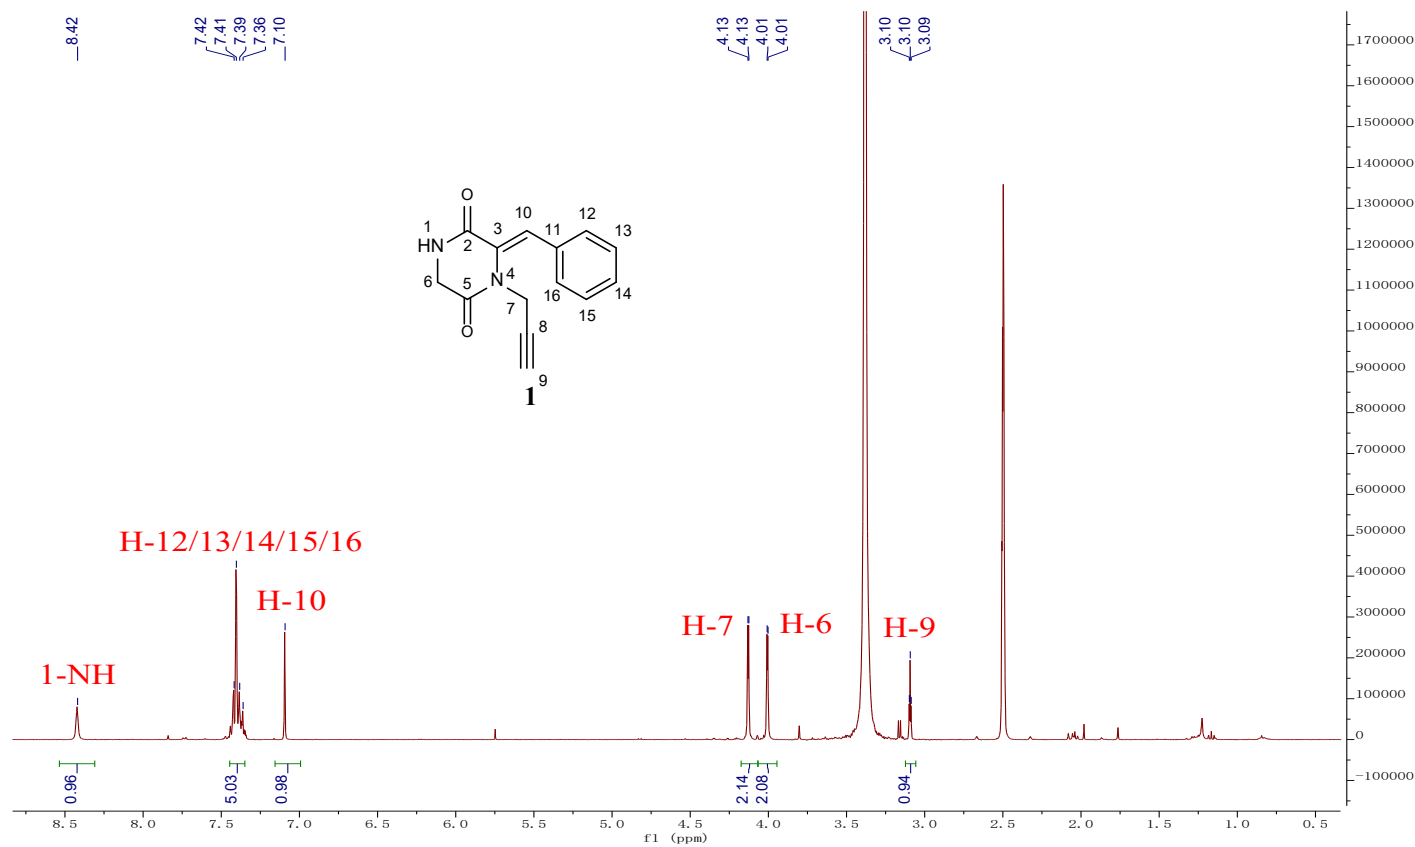

**Figure S1.**  $^1\text{H}$  NMR spectrum of compound **1** in  $\text{DMSO}-d_6$  (400 MHz).



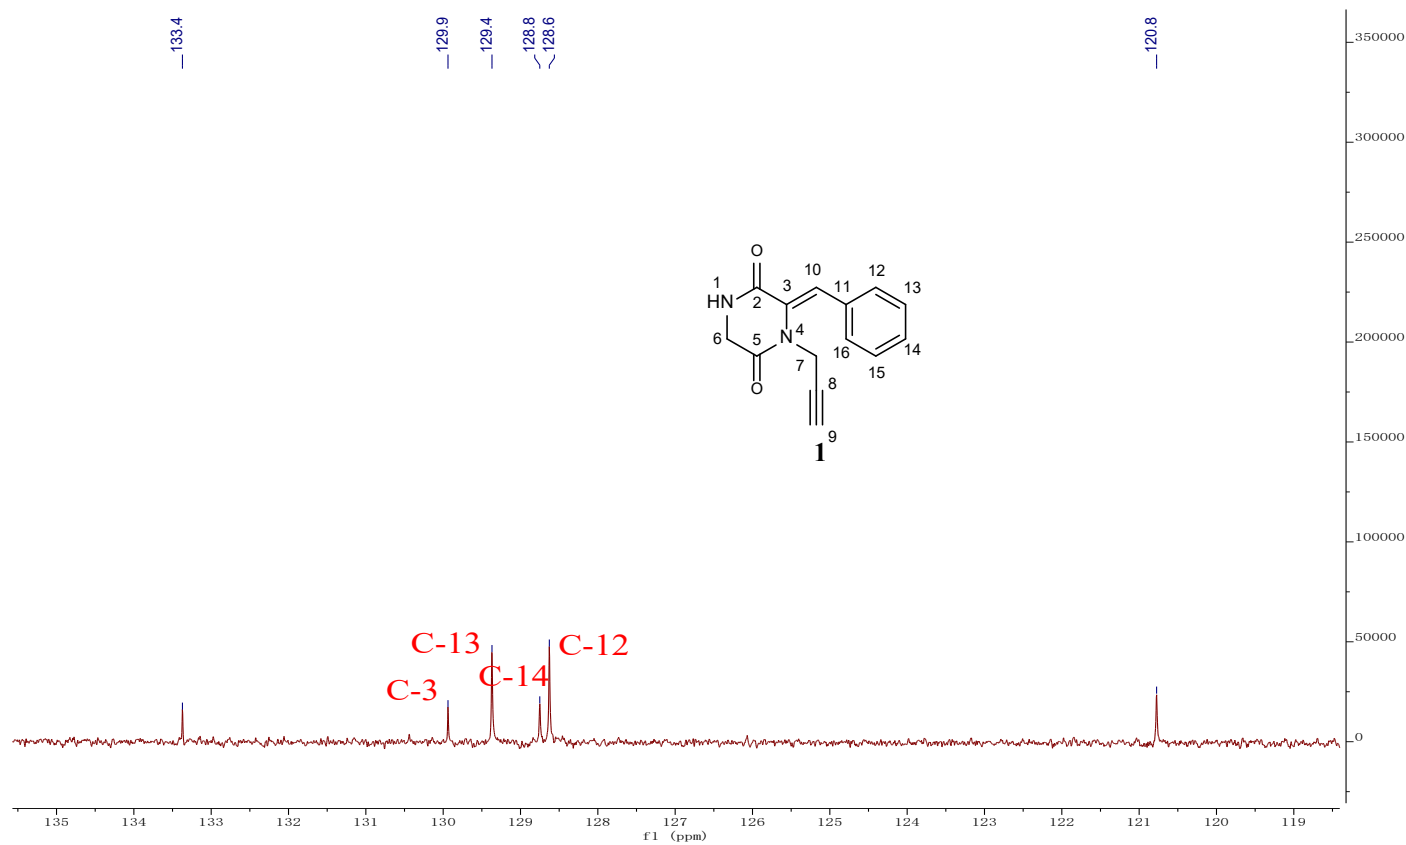

**Figure S3.** Partial  $^{13}\text{C}$  NMR spectrum of compound **1** in  $\text{DMSO}-d_6$  (100 MHz).

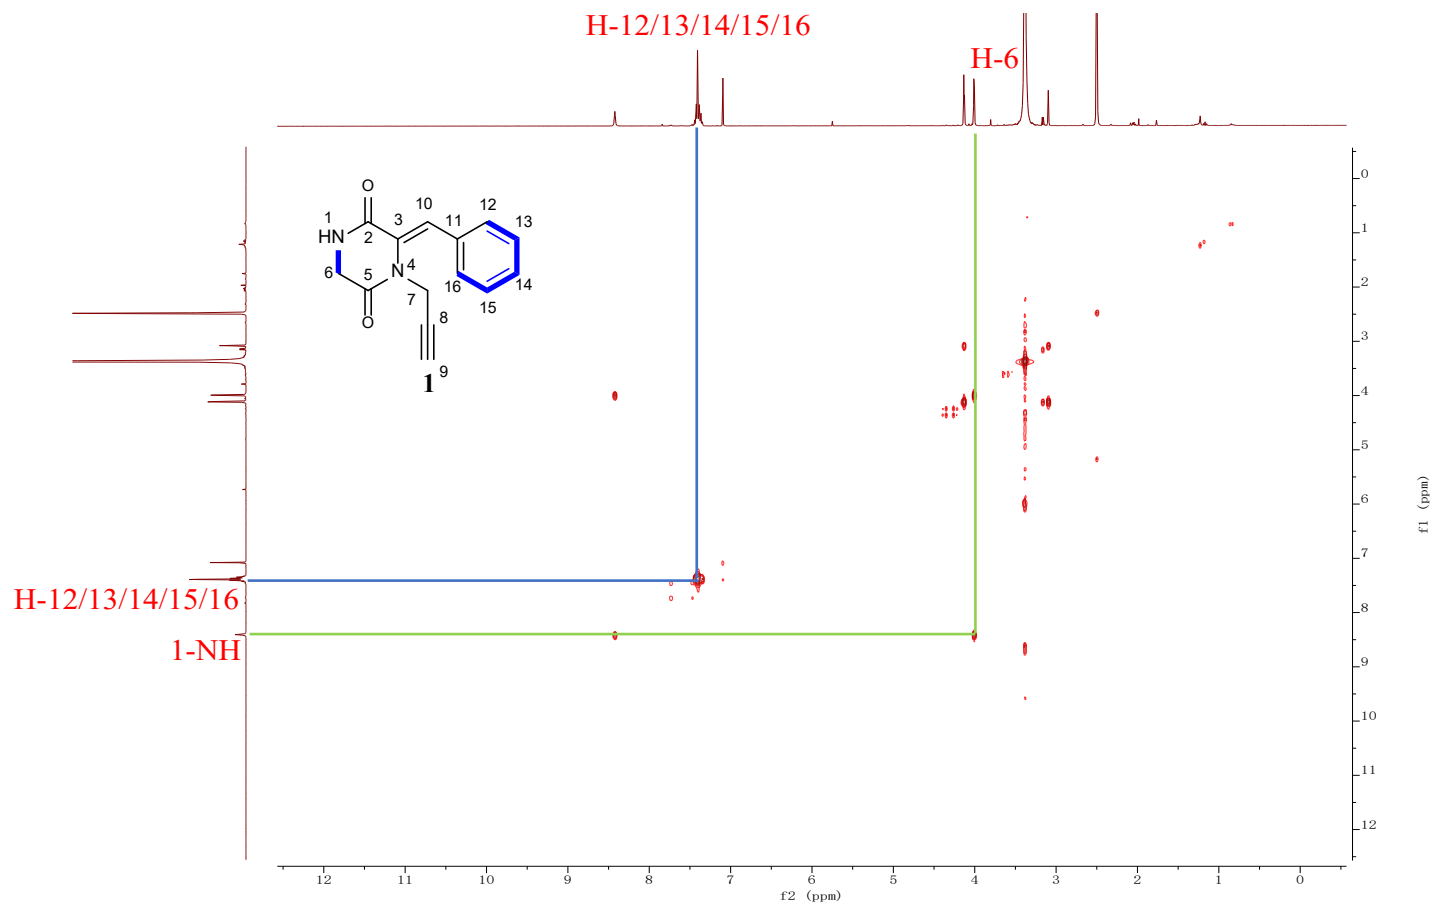

**Figure S4.**  $^1\text{H}$ - $^1\text{H}$  COSY spectrum of compound **1** in  $\text{DMSO}-d_6$ .

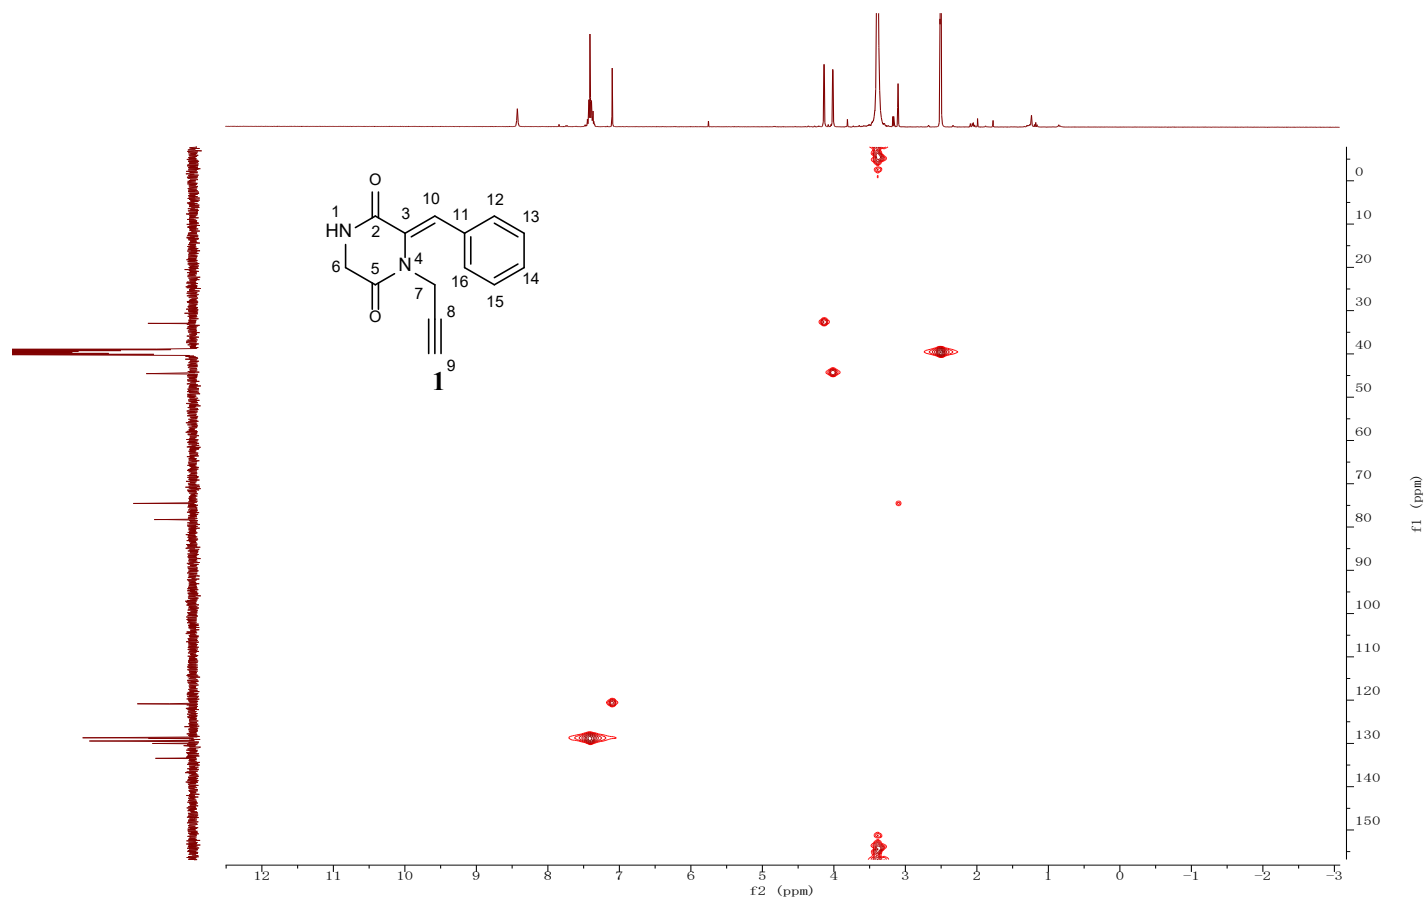

**Figure S5.** HSQC spectrum of compound **1** in DMSO-*d*<sub>6</sub>.

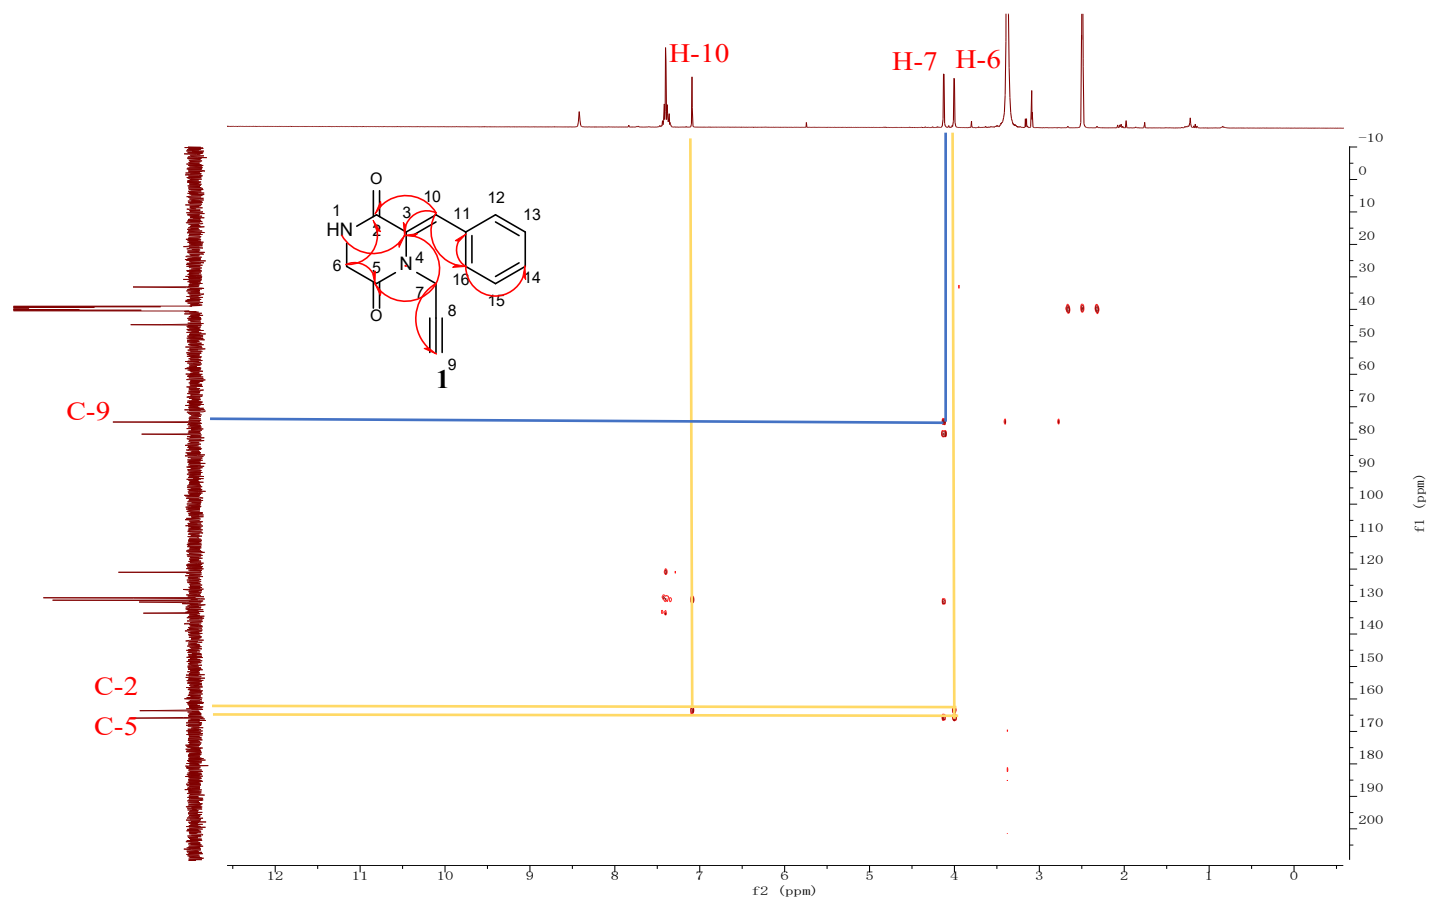

**Figure S6.** HMBC spectrum of compound **1** in  $\text{DMSO}-d_6$ .



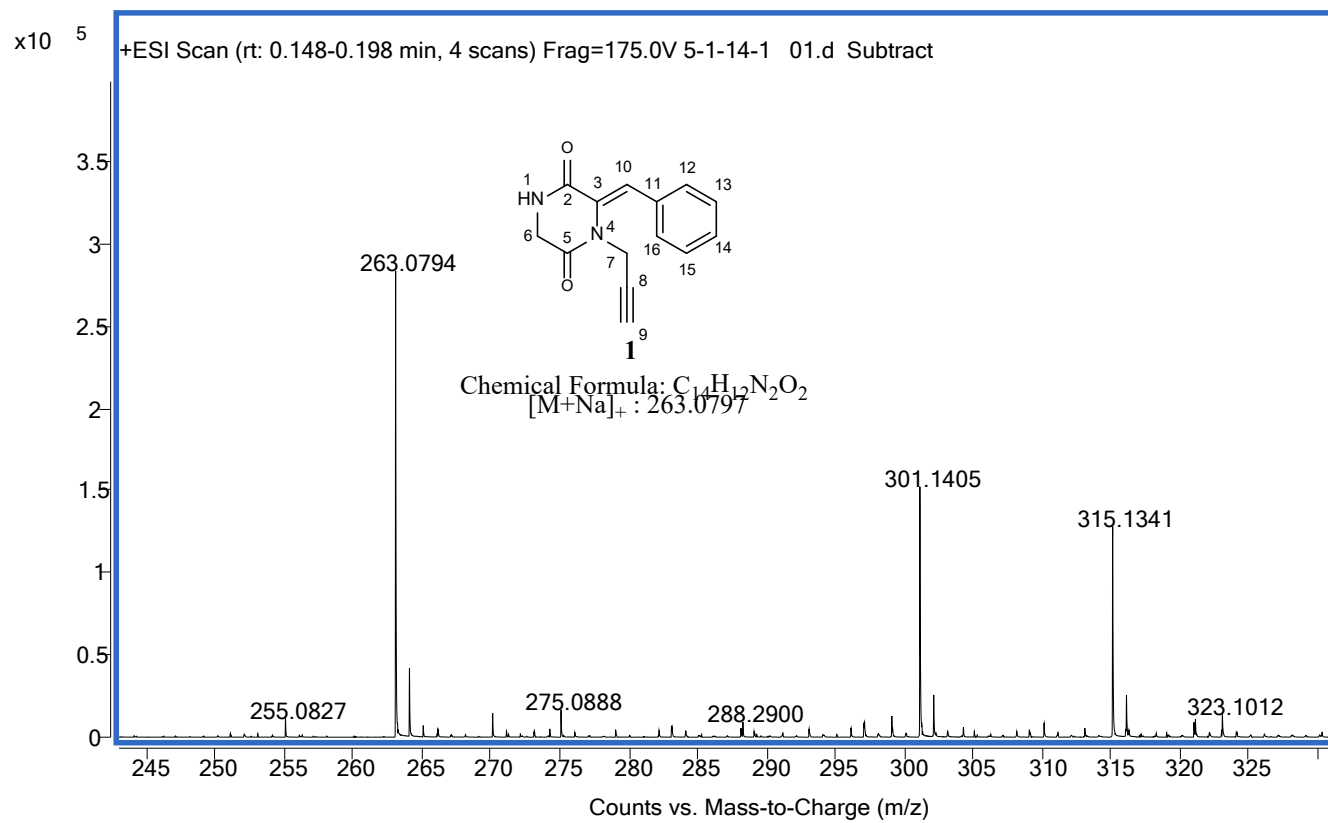

**Figure S7.** HRESIMS spectrum (positive ion mode) of compound **1**.

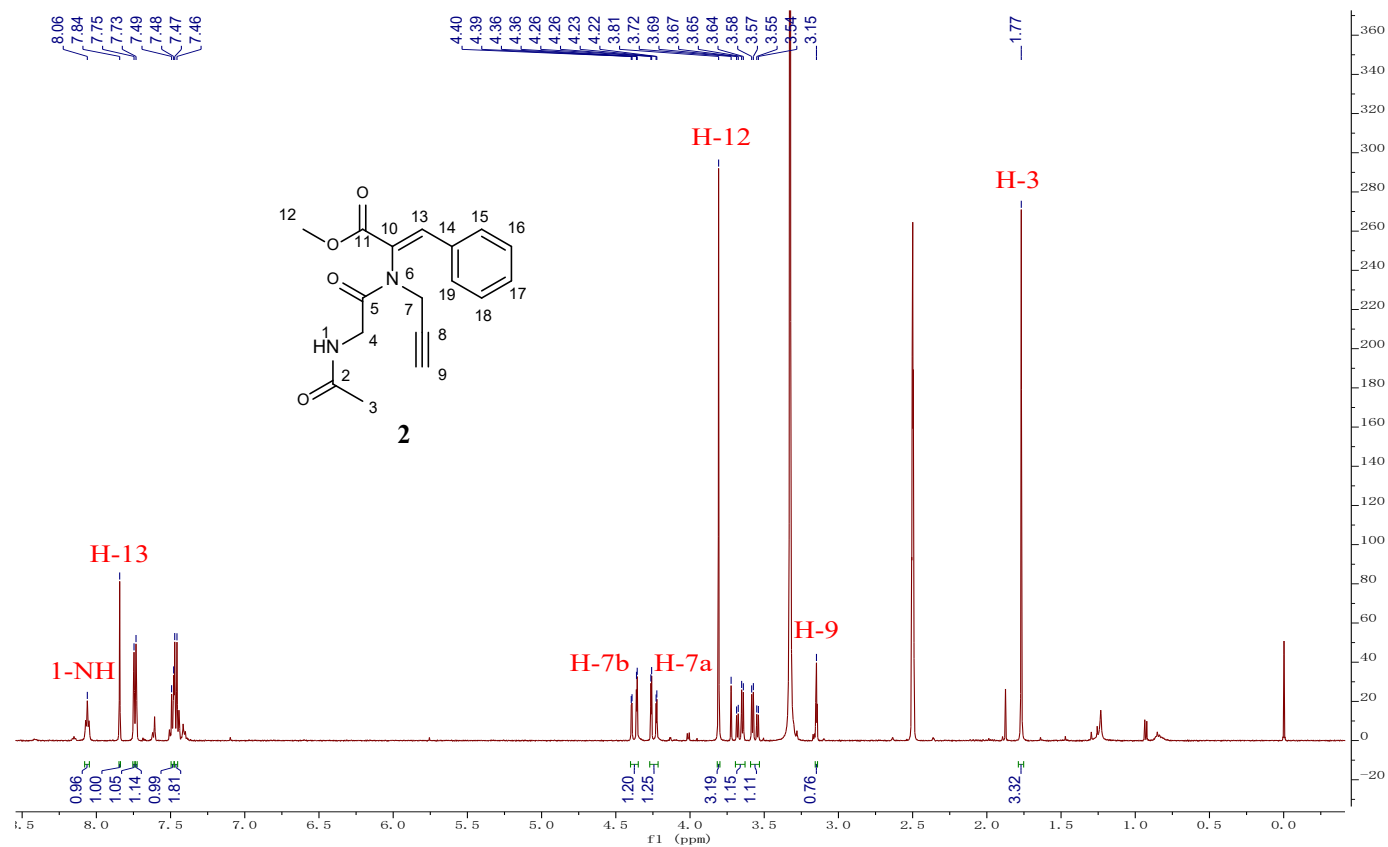

**Figure S8.**  $^1\text{H}$  NMR spectrum of compound **2** in  $\text{DMSO}-d_6$  (600 MHz).

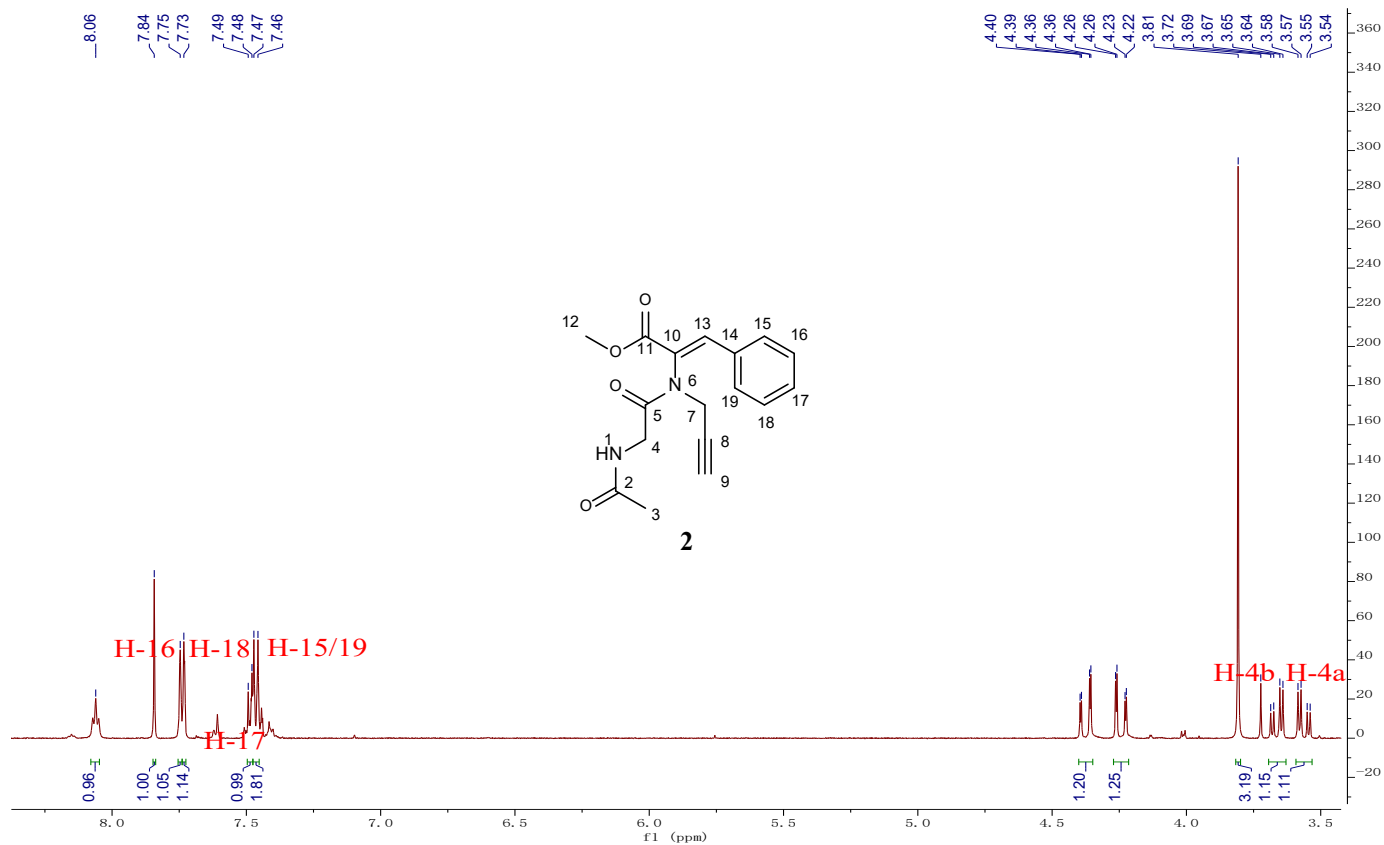

**Figure S9.** Partial  $^1\text{H}$  NMR spectrum of compound **2** in  $\text{DMSO}-d_6$  (600 MHz).

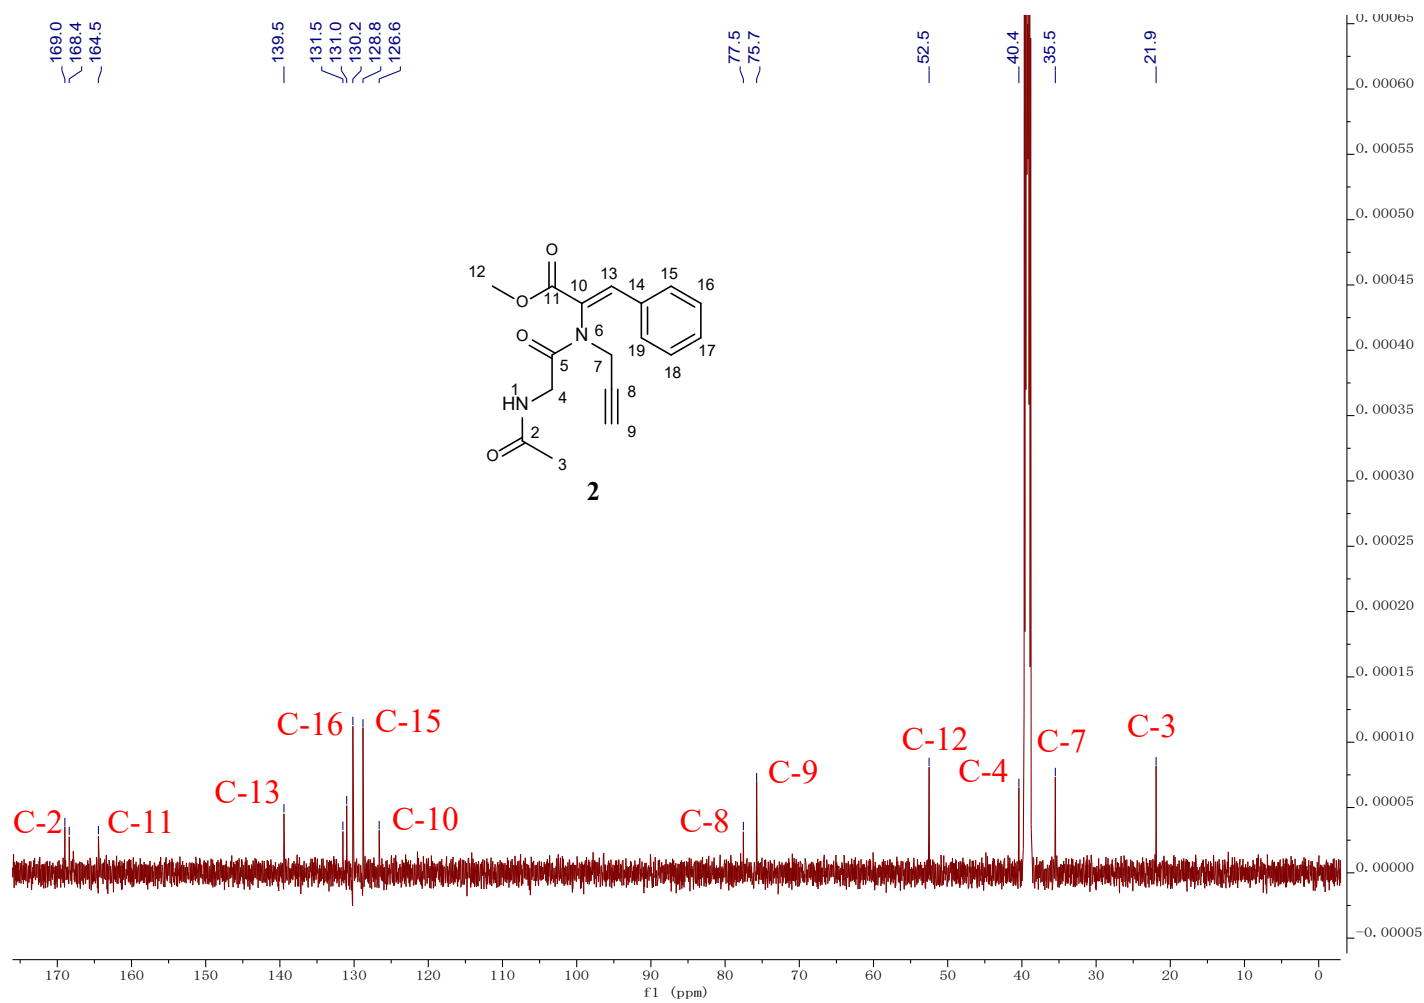

**Figure S10.**  $^{13}\text{C}$  NMR spectrum of compound **2** in  $\text{DMSO}-d_6$  (150 MHz).

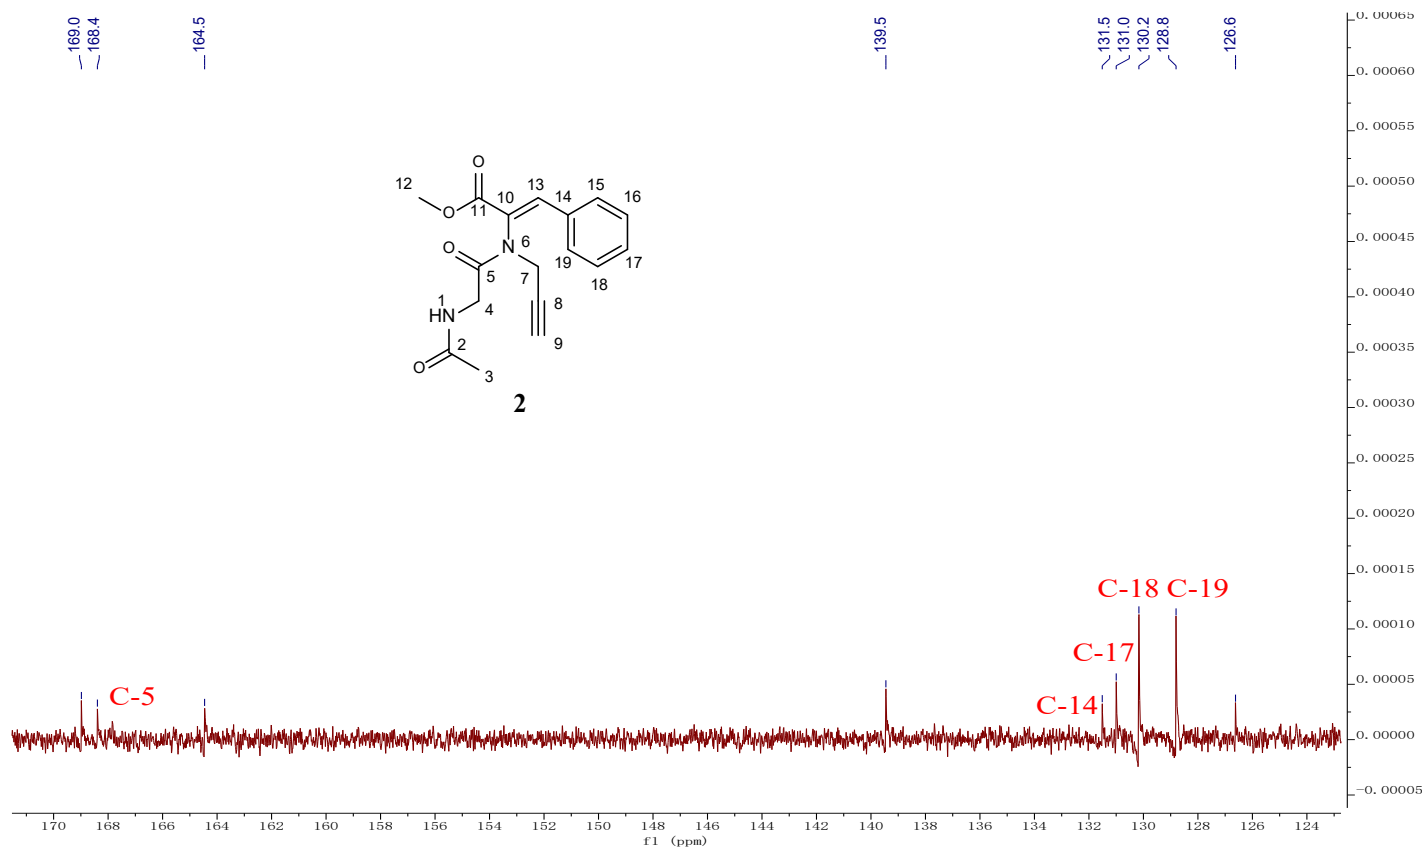

**Figure S11.** Partial  $^{13}\text{C}$  NMR spectrum of compound **2** in  $\text{DMSO}-d_6$  (150 MHz).

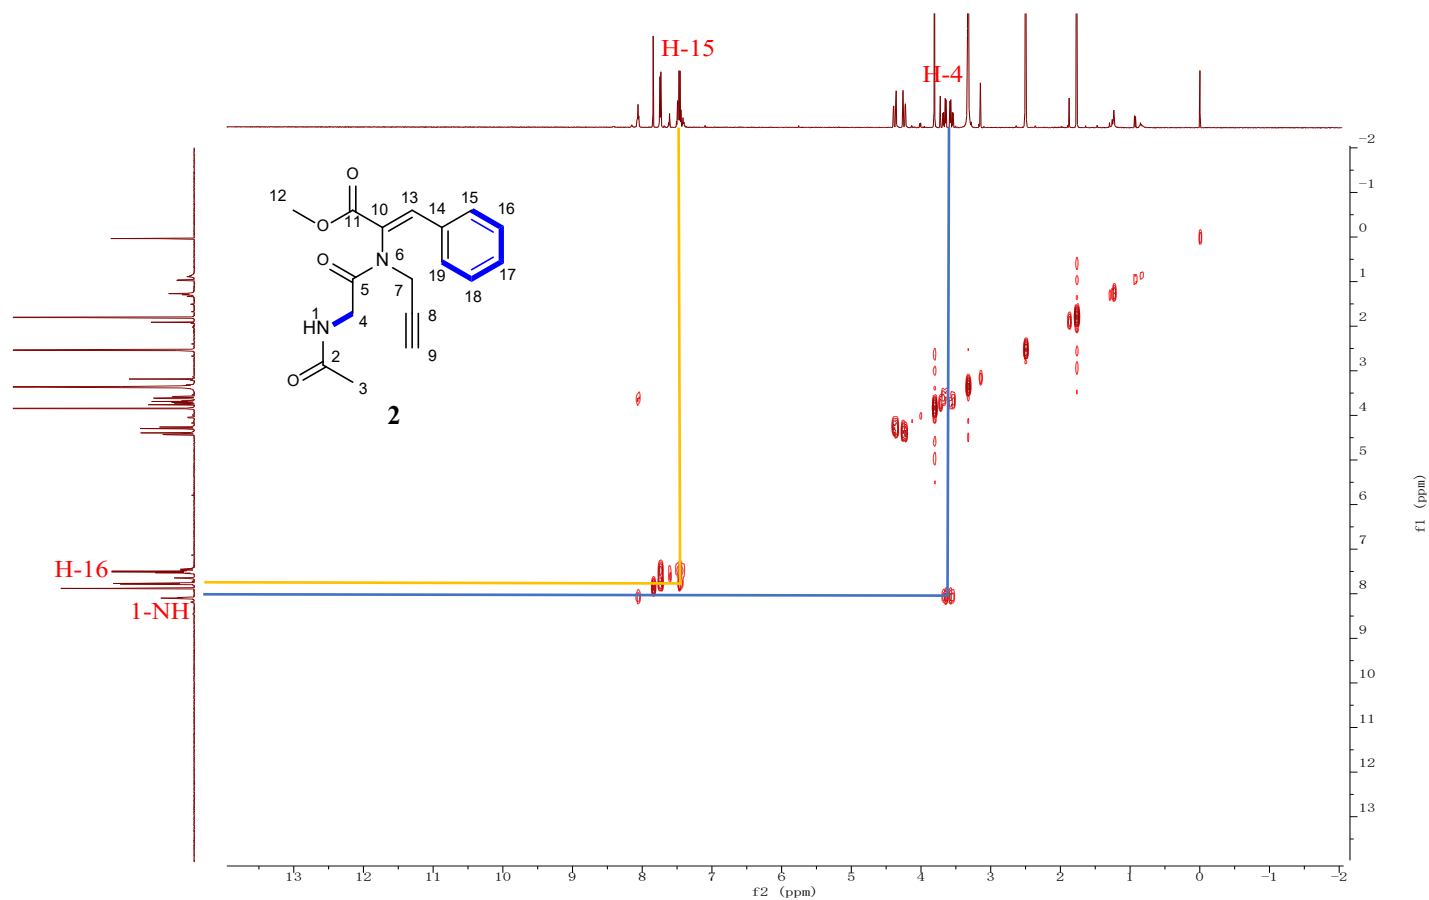

**Figure S12.**  $^1\text{H}$ - $^1\text{H}$  COSY spectrum of compound **2** in  $\text{DMSO}-d_6$ .

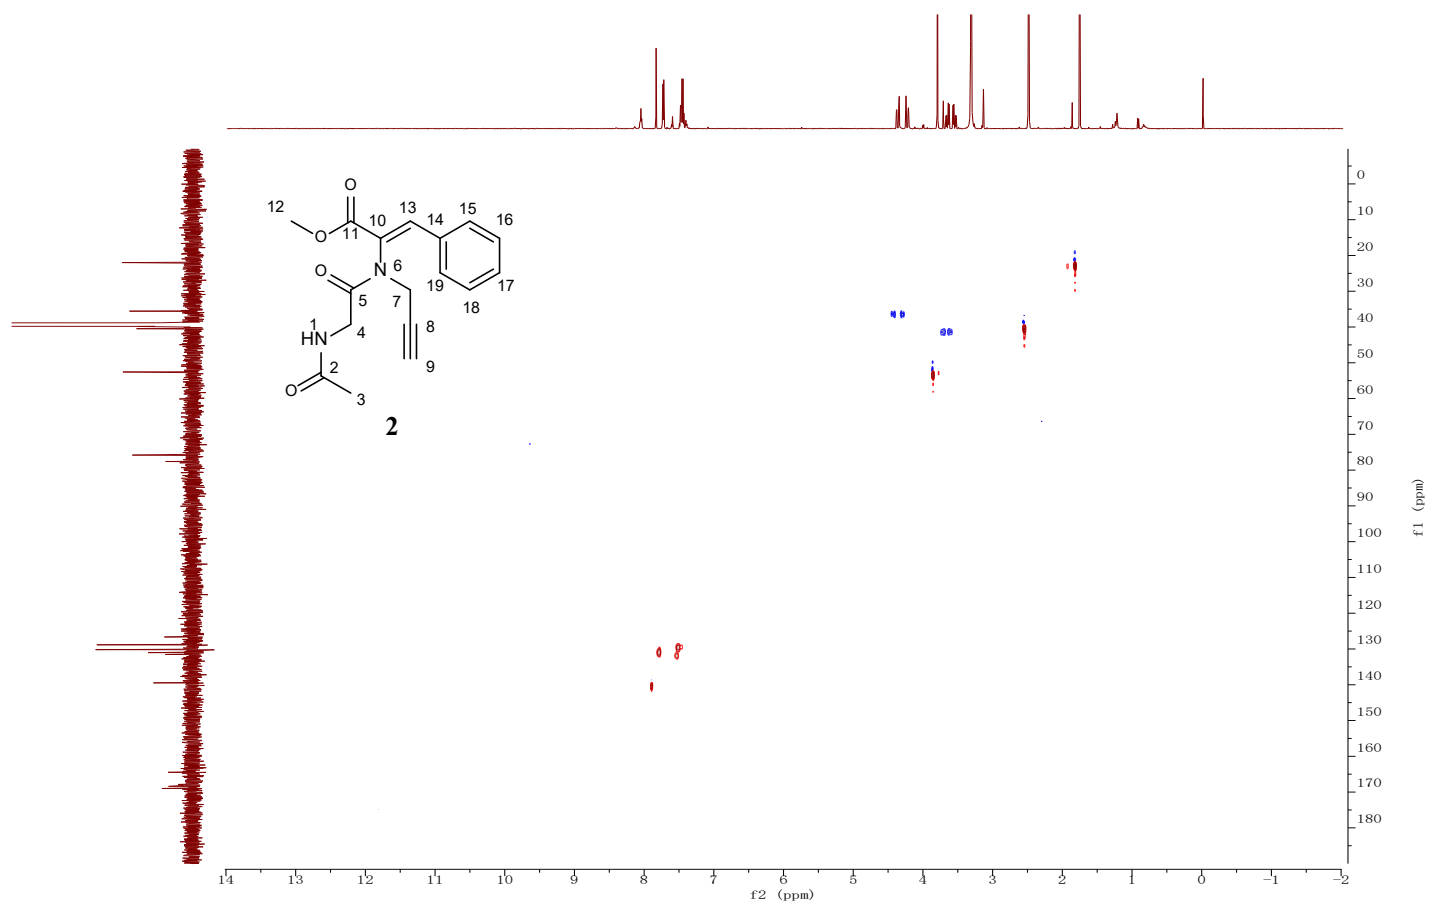

**Figure S13.** HSQC spectrum of compound **2** in  $\text{DMSO}-d_6$ .

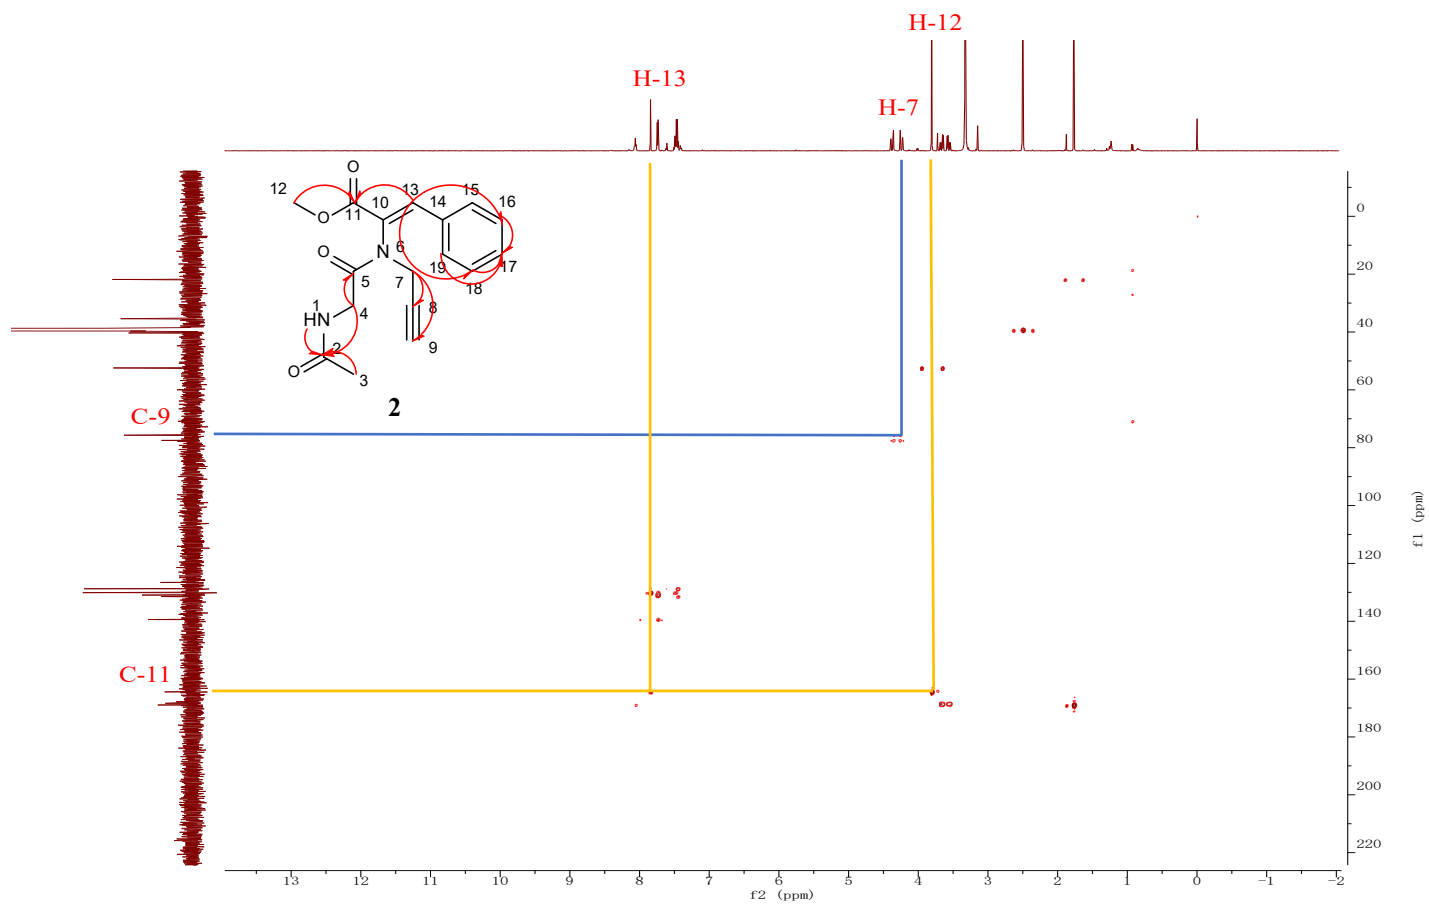

**Figure S14.** HMBC spectrum of compound **2** in DMSO-*d*<sub>6</sub>.



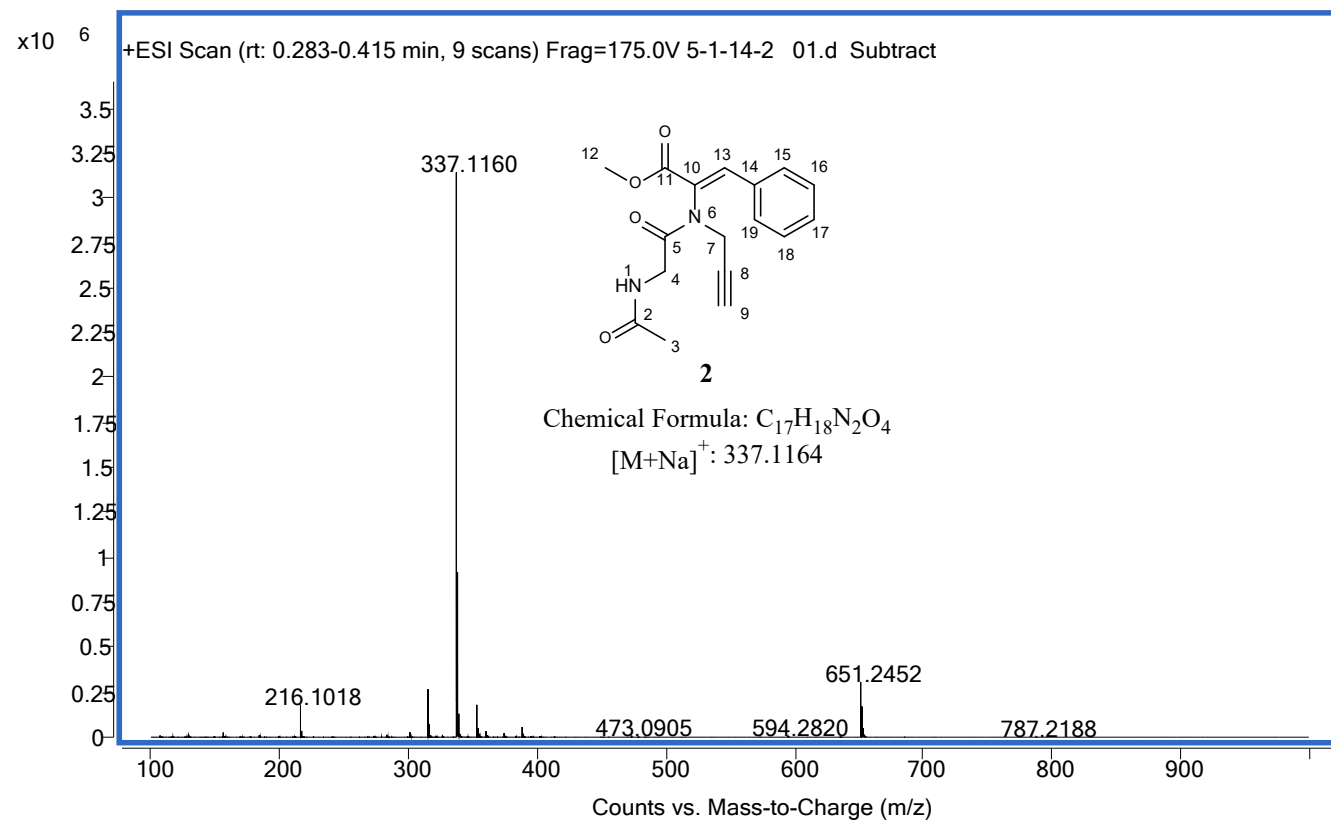

**Figure S15.** HRESIMS spectrum (positive ion mode) of compound **2**.

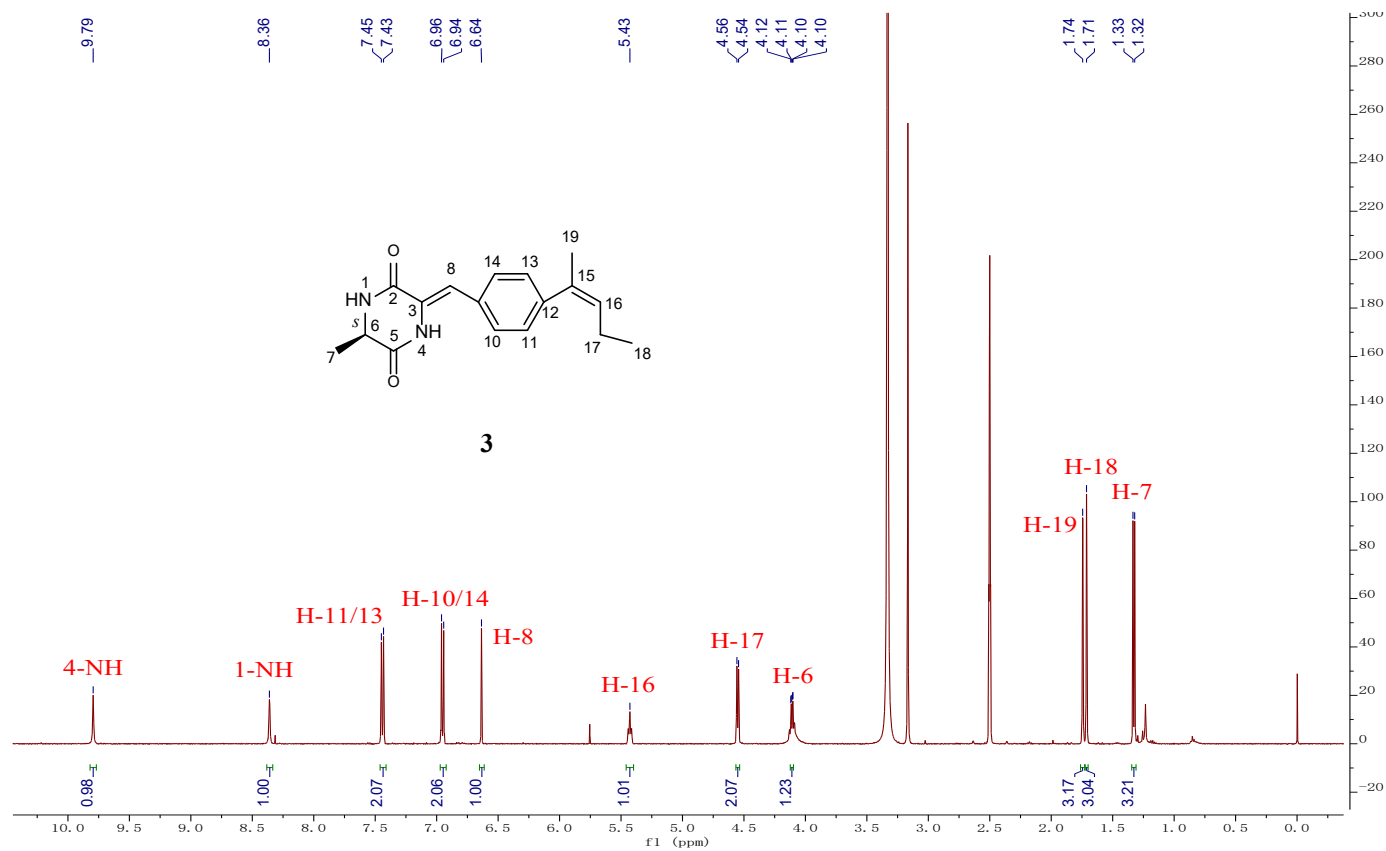

**Figure S16.**  $^1\text{H}$  NMR spectrum of compound **3** in  $\text{DMSO}-d_6$  (500 MHz).

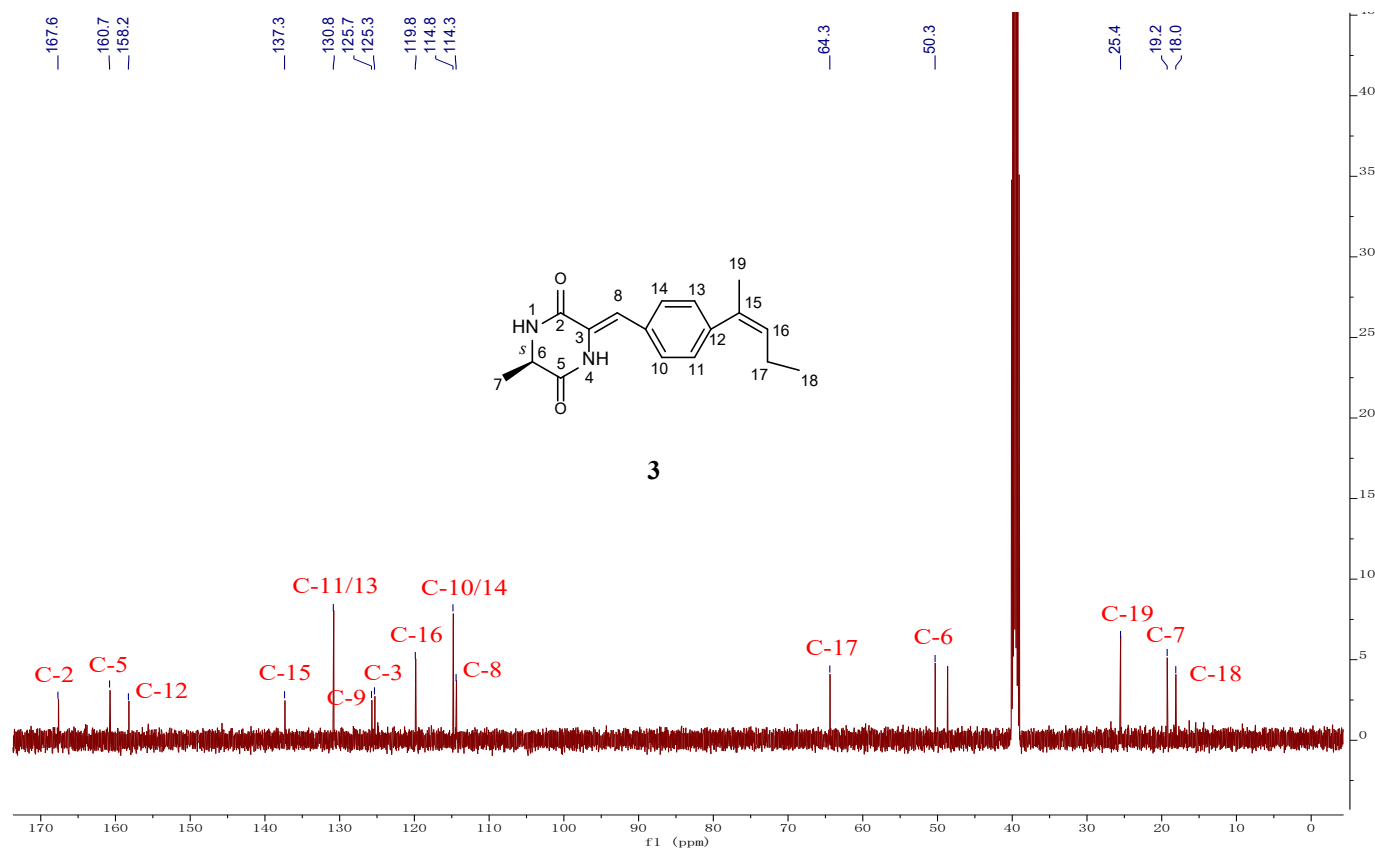

**Figure S17.**  $^{13}\text{C}$  NMR spectrum of compound **3** in  $\text{DMSO-}d_6$  (125 MHz).

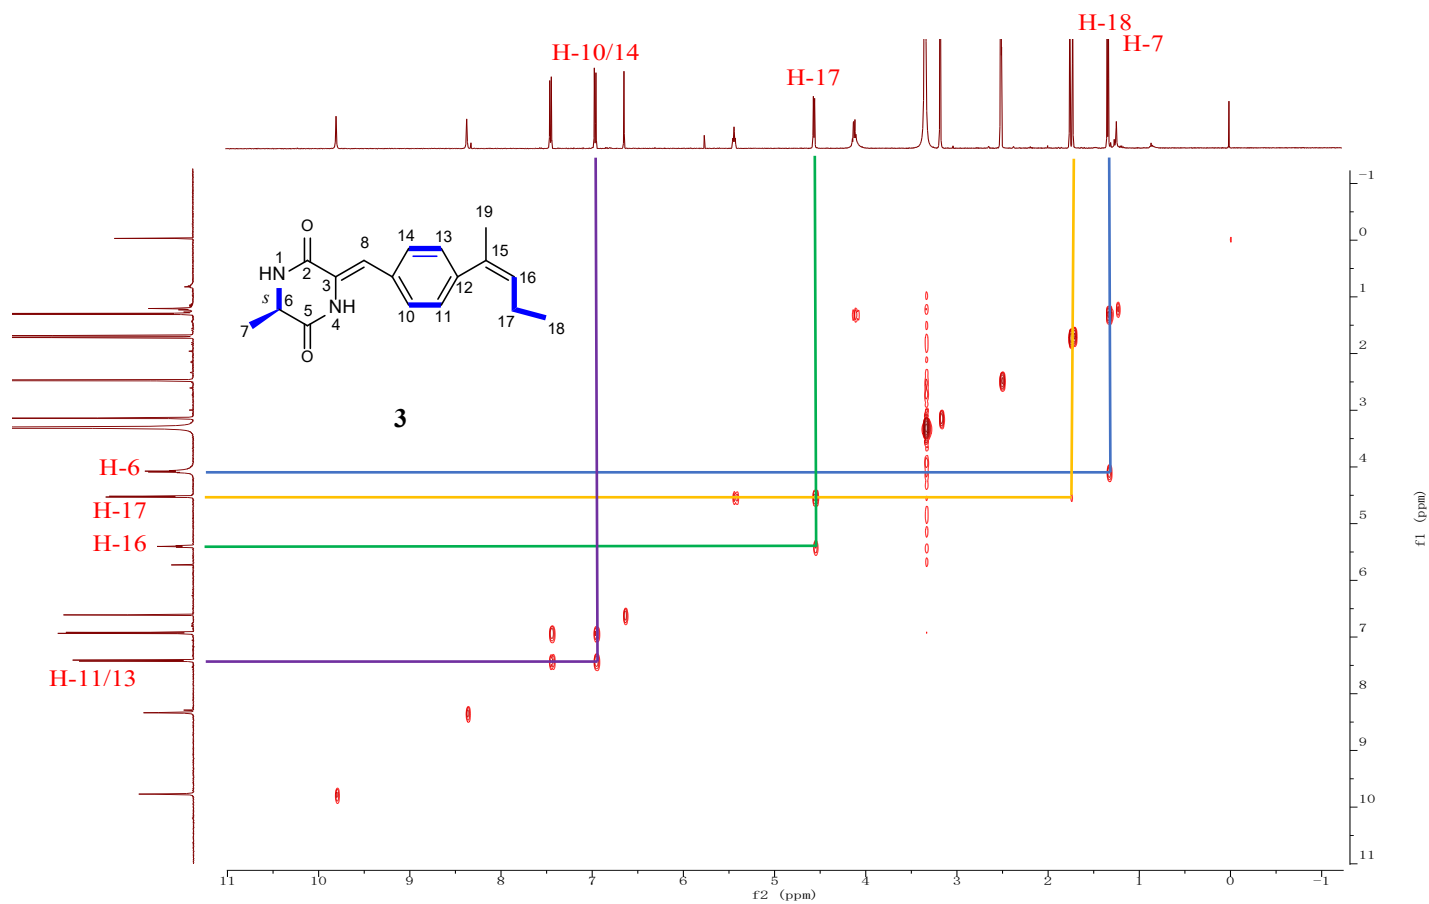

**Figure S18.**  $^1\text{H}$ - $^1\text{H}$  COSY spectrum of compound **3** in  $\text{DMSO}-d_6$ .

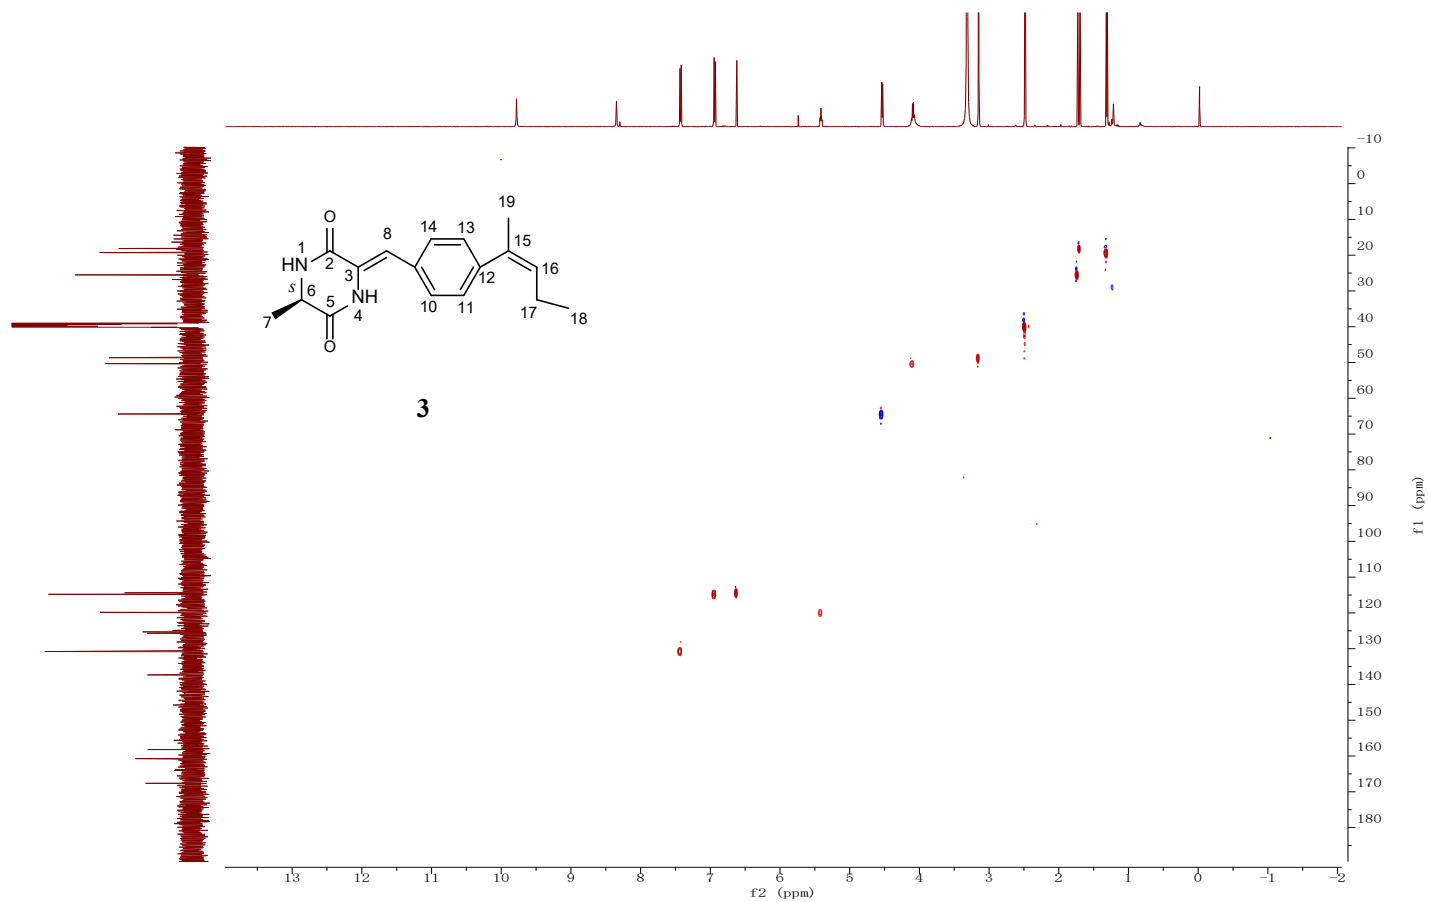

**Figure S19.** HSQC spectrum of compound **3** in DMSO-*d*<sub>6</sub>.

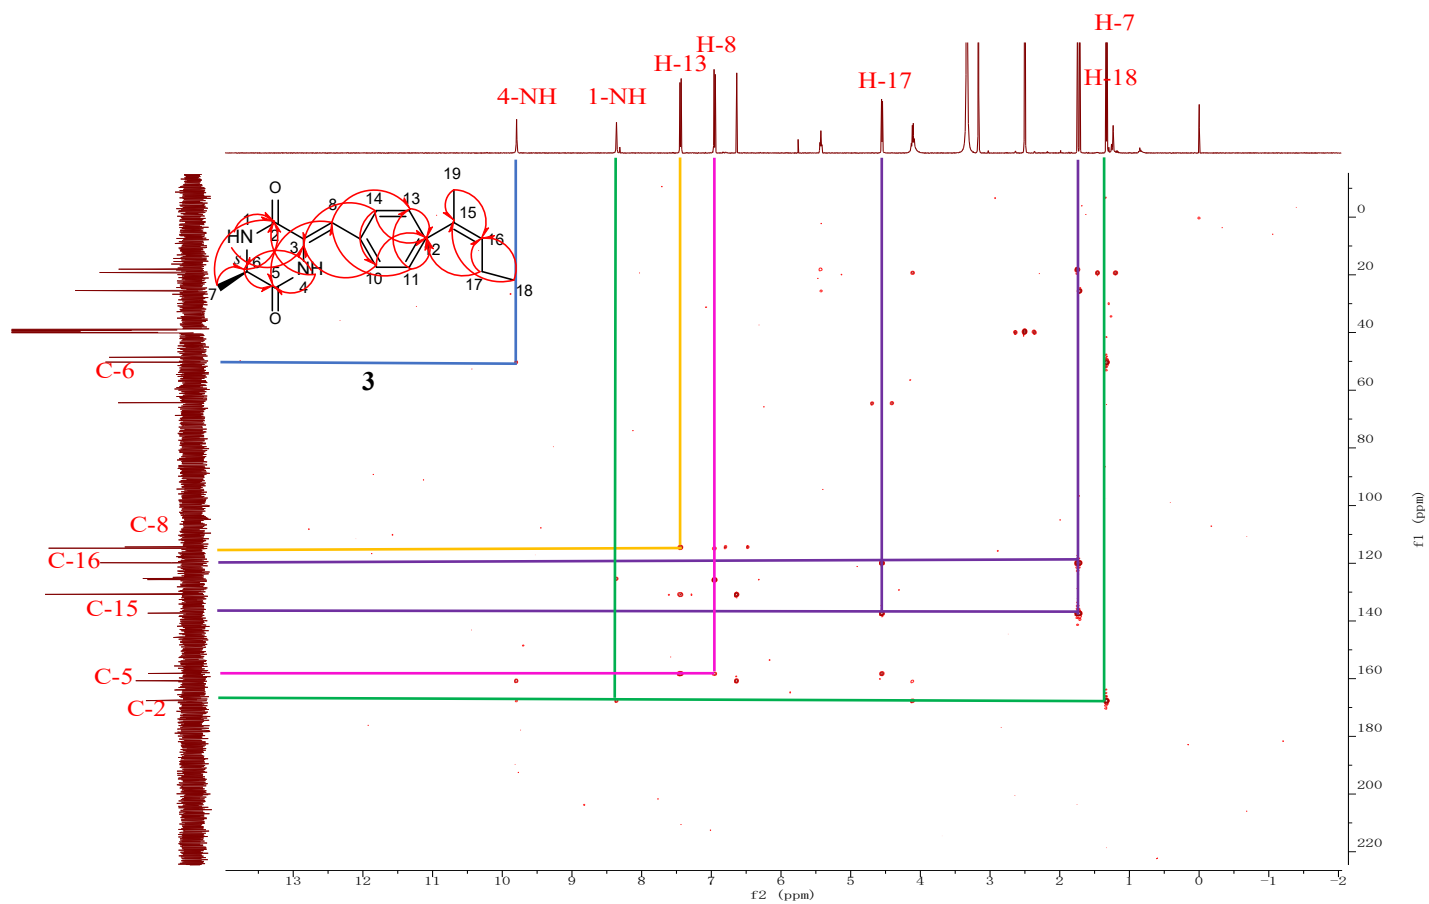

**Figure S20.** HMBC spectrum of compound **3** in DMSO- $d_6$ .

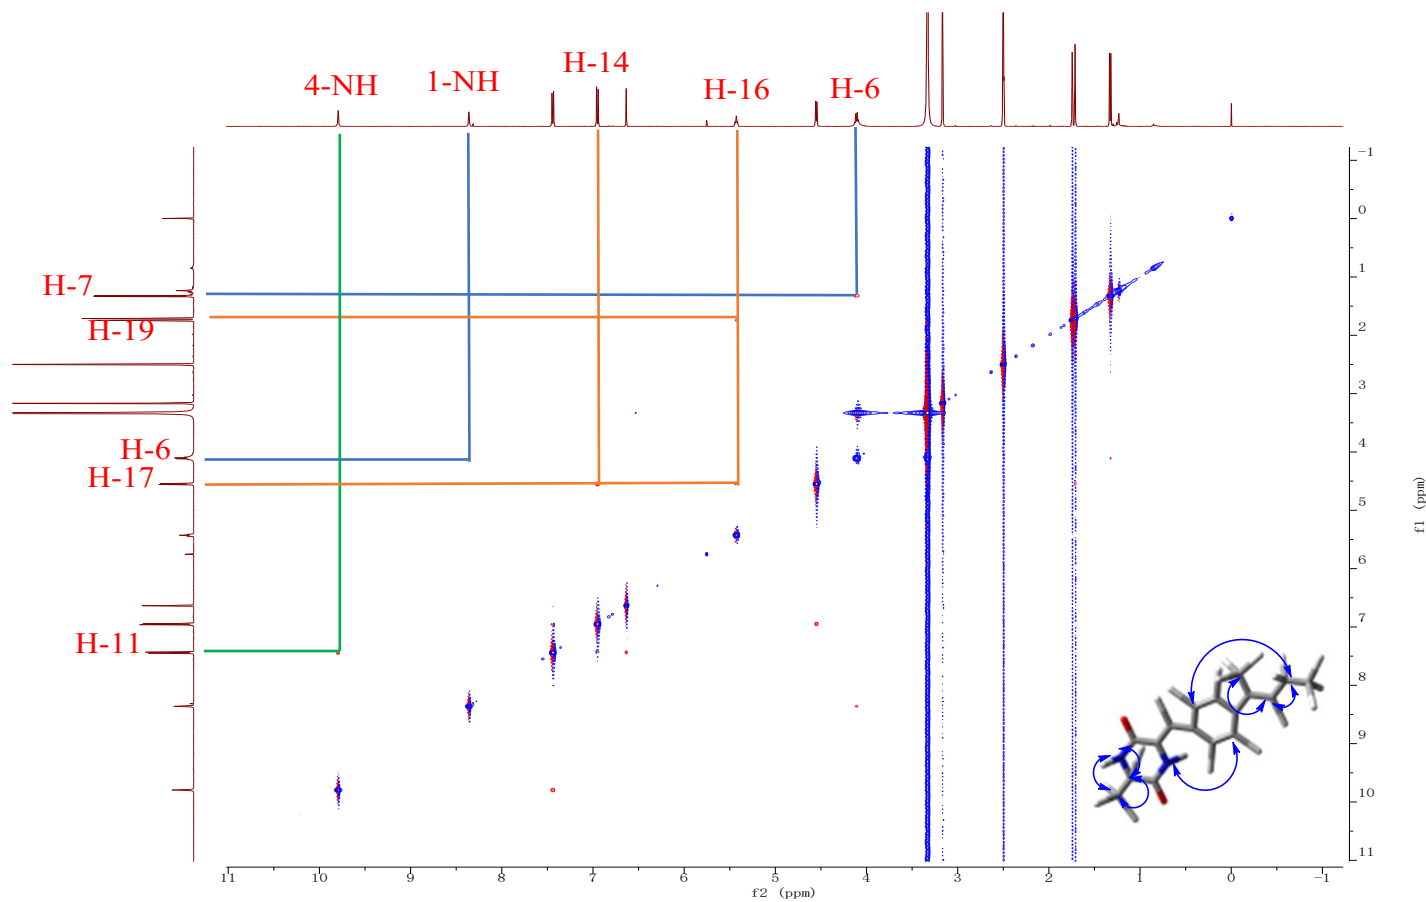

**Figure S21.** NOESY spectrum of compound **3** in DMSO- $d_6$ .

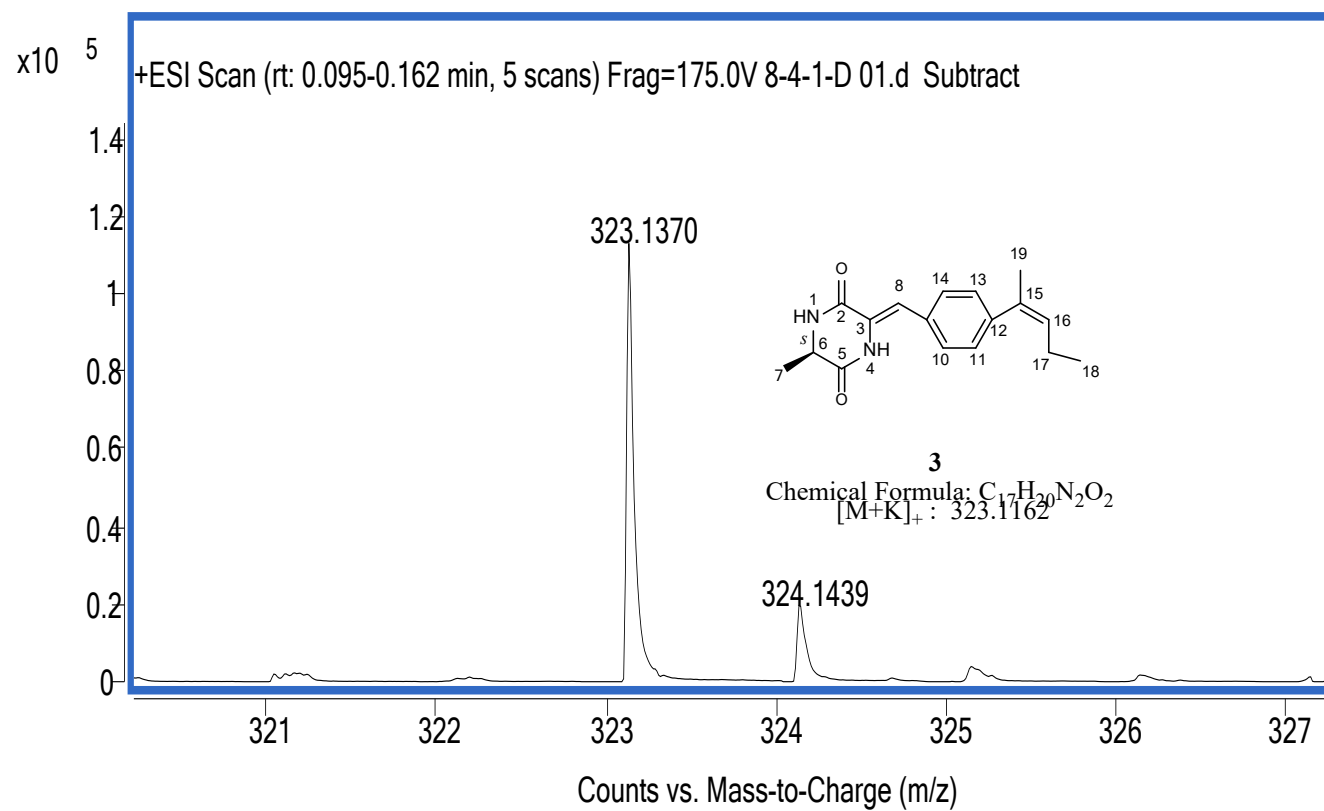

**Figure S22.** HRESIMS spectrum (positive ion mode) of compound **3**.



**Table S1.** The activity results about antitumor of compound **3**.

| Compound | Concentration( $\mu$ M) | Cell inhibition $\pm$ SD (%) |                   |                  |                   |
|----------|-------------------------|------------------------------|-------------------|------------------|-------------------|
|          |                         | K-562                        | 786-O             | TE-1             | 5637              |
| 3        | 20                      | 12.54 $\pm$ 0.90             | 10.50 $\pm$ 2.44  | 3.12 $\pm$ 2.51  | -8.57 $\pm$ 2.14  |
| Compound | Concentration( $\mu$ M) | Cell inhibition $\pm$ SD (%) |                   |                  |                   |
|          |                         | A549                         | MKN-45            | HCT 116          | HeLa              |
| 3        | 20                      | 0.34 $\pm$ 2.89              | -9.53 $\pm$ 2.83  | 2.36 $\pm$ 1.34  | 4.32 $\pm$ 0.76   |
| Compound | Concentration( $\mu$ M) | Cell inhibition $\pm$ SD (%) |                   |                  |                   |
|          |                         | GBC-SD                       | L-02              | MCF7             | HepG2             |
| 3        | 20                      | 9.14 $\pm$ 0.40              | 0.68 $\pm$ 2.33   | -2.20 $\pm$ 3.23 | -9.74 $\pm$ 3.55  |
| Compound | Concentration( $\mu$ M) | Cell inhibition $\pm$ SD (%) |                   |                  |                   |
|          |                         | SF126                        | DU145             | CAL-62           | PATU8988T         |
| 3        | 20                      | -0.89 $\pm$ 3.61             | -1.23 $\pm$ 3.79  | -4.54 $\pm$ 3.43 | -13.91 $\pm$ 1.81 |
| Compound | Concentration( $\mu$ M) | Cell inhibition $\pm$ SD (%) |                   |                  |                   |
|          |                         | HOS                          | A-375             | A-673            | 293T              |
| 3        | 20                      | 2.55 $\pm$ 4.62              | -11.95 $\pm$ 0.26 | 8.17 $\pm$ 2.02  | 0.14 $\pm$ 1.80   |

**Table S2.** The activity results about anti-inflammatory of compounds **1–3**.

|                   | <b>1</b>    | <b>2</b>   | <b>3</b>   | dexamethasone |
|-------------------|-------------|------------|------------|---------------|
| Inhibition±SD (%) | 26.31±11.58 | 28.92±3.49 | 21.08±9.24 | 25.87±15.16   |
